# Supplementary material for: Impact of musculoskeletal symptoms on physical functioning and quality of life among treated people with HIV in high and low resource settings: A case study of the UK and Zambia
Source: PubMed Central journal article supplement (PMC6513081; doi:10.1371/journal.pone.0216787), 2019-05-13
Supplement: pone.0216787.s001.pdf [file pone.0216787.s001.pdf]

## Socio-demographic data:

Patient Number:

Umwaume  Umwanakashi

imyaka  Imyaka panshita yakusangwa nobulwele

Imyaka inga elyo tamulasanga nobulwele

Apapelela amasambililo: Takuli  Isukulu lyakwambilapo

Isukulu likalamba (sekondali)  Isukulu likalamba ilya koleji

Isukulu likalamba ilya yuniveziti

Umupelela ukufola (pamwaka): ≤ ukulingana na K10 000 nangula panshi

K10 000 ukufika ku 30 000  K30 000 ukufika ku 50 000  K50 000 nokucilapo

Icupo: Ukupwa  Ukukana upwa  ukwenda naumo

Ukubomba: ubanincito  Ukukanabomba

Incito:

Bushe nimwe mufola mulupwa: Emukwai  Iyo

Icicetakelo:

Balapepa fwaka: Emukwai  Iyoo

BMI (Ubutali nokufina):

Inshila yakwambwilamo: Abaume nabanakashi  abaume/abanakashi bekabeka   
mumulopa  Ukufuma kulinyina ukuya kumwana

Co-morbidities (bushe mwalikwata amalwele yambi ayakunwa umuti (medical), ikuputulwa (surgical) nangula ayakumutima/amatontonkanyo (psychological)

|                            |  |
|----------------------------|--|
| Ayakunwa umuti             |  |
| Ayakuputulwa               |  |
| Ayamumutima/amatontonkanyo |  |

Bushe mwalikwata ?

Hepatitis B: Emukwai  Awe

Hepatitis C: Emukwai  Awe  Ukupola bwino bwino

Tuberculosis: Emukwai  Awe  Ukupola bwino bwino

Amalwele yambi ayakusenda mukulalana: Emukwai  Awe  Ukupola bwino bwino

Ngacakutila cilifi, yesa? Mukwai peleni ubulondoloshi panshi pamo nga. Ukusangwa, nokucecentwa:

Imiku mwatekwa mucipatala panuma ya kusangwa nobulwele:

Mukwai peleni ubulondoloshi pali cila kutekwa pamo nga Ukusangwa, nokucecentwa

Impenwa ya CD4 count iyakulekelesha:

Impenwa ya viral load iyakulekelesha:

Bushe mulenwa ama ARV? Emukwai  Awe

Mutundu nshi wa muti wa ma ARV eyo munwa ?

Mukwai peleni ubulondoloshi pamo nga inshiku, impendwa yamuti munwa:
