# Supplementary material for: Impact of musculoskeletal symptoms on physical functioning and quality of life among treated people with HIV in high and low resource settings: A case study of the UK and Zambia
Source: PubMed Central journal article supplement (PMC6513081; doi:10.1371/journal.pone.0216787), 2019-05-13
Supplement: pone.0216787.s002.pdf [file pone.0216787.s002.pdf]

## Ampusho:

### Ufilangililo fya bulwele bwabukali bwa mumubili:

Ampusho yalekonka yalelola kufintu limbi ifyacitike ukufuma epo mwaishiba ukuti mwalikwata HIV. Mukwai congeni mukabokoshi ngefilefwaika.

Bushe mulakwata ubukali mufiputulwa fyamumubili? Emukwai  Awe

Ngacili ngefi langeni amaka yabukali ukubomfya sikelo uuli panshi?

Ukukana  
umfwa 0 1 2 3 4 5 6 7 8 9 10 Ukukalipa  
ubukali sana

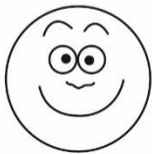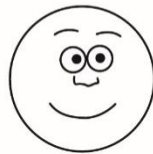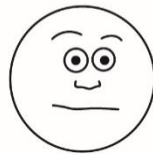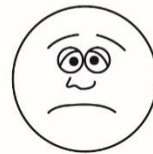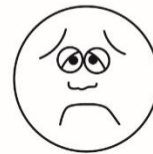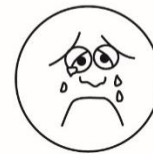

Ngacili ngefi, mukwai lembeni pafimpashanya ifili panshi, incende emo mumfwa ubukali?

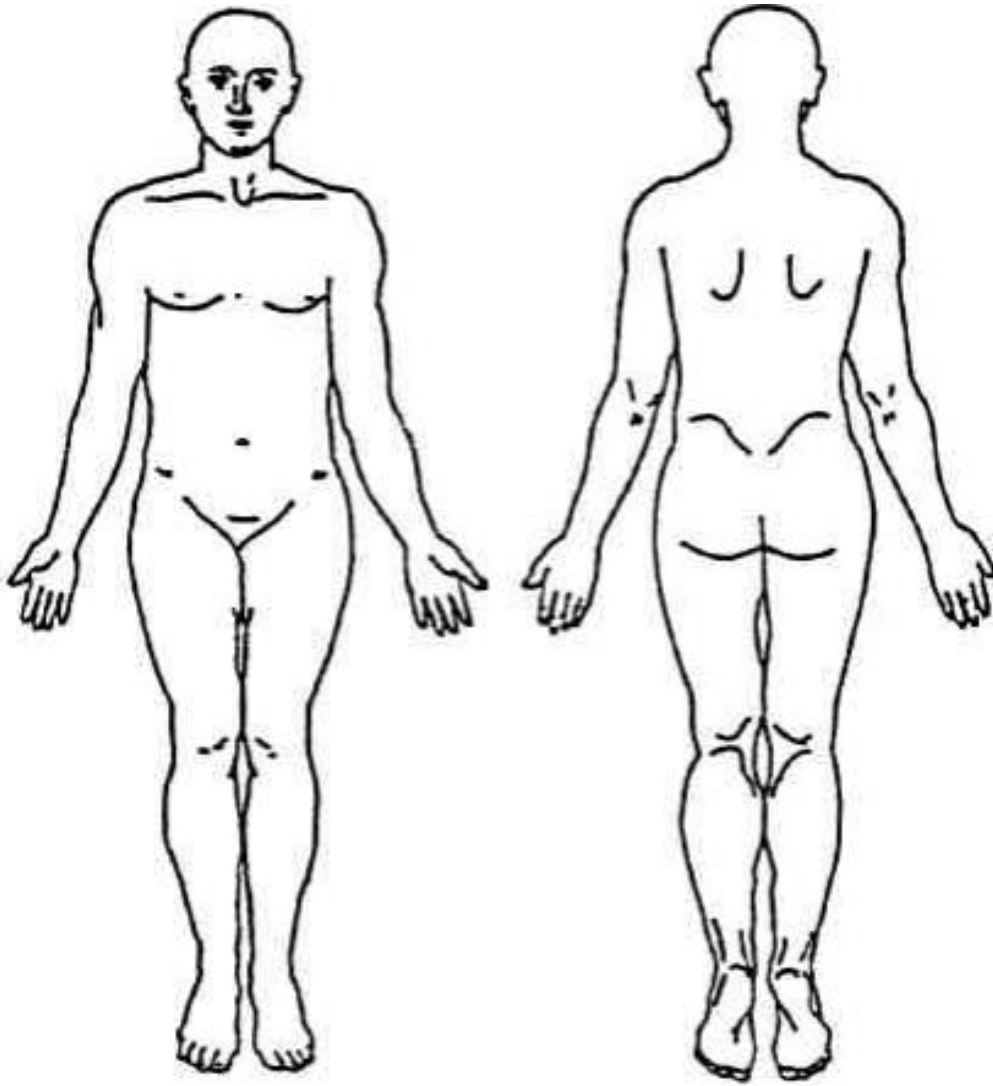

Bushe mwalibala amufimbapo mufiputulwa fya mumubili? Emukwai  Awe

Bushe mwalubala amumonapo ukubwekela panshi ukwa kusela kwa mufiputulwa fya mumubili?

Emukwai  Awe

Bushe mulakwata ukukosa kwa mufiputulwa fyamumubili nangula mumunofu ulucelo?

Emukwai  Awe

(ukukosa tulepilibula inshita kuba ubwafya ukusesha umunofu nokukontola ifiputulwa fyamubili; nafikosa)

Bushe ninshita yalepa shani ukukosa kusenda ukufuma inshita yakubuka?

Panshi ya insa amakumi yatatu  Ukucila insa amakumi yatatu

Bushe mwalibala amukwatapo ubukali mumunofu? Emukwai  Awe

Ngacili ngefi langeni amaka yabukali ukubomfya sikelo uuli panshi?

Ukukana  
umfwa  
ubukali

0 1 2 3 4 5 6 7 8 9 10

Ukukalipa  
sana

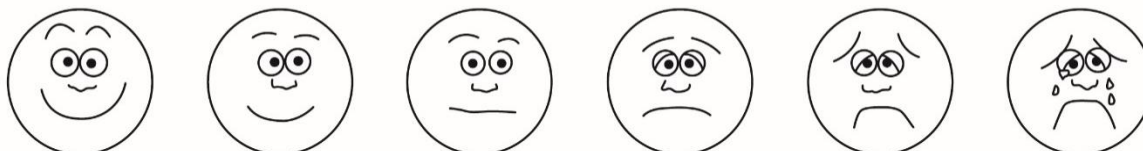

Bushe mwalibala amukwata ubukali nokukosa kwamukosi? Emukwai  Awe

Bushe mwalibala amukwata ubukali nokukosa kwamukosi? Emukwai  Awe

Bushe mwalibala amumonapo ubukali ubulibonse mututende? Emukwai  Awe

Bushe mulakwakapo ubwafya pakwikata/ukufina icintu? Emukwai  Awe

Bushe amenso yenu yalakaba inshita yonse, ukumfwika ukuma nangula ngumuli amabwe?

Emukwai  Awe

Bushe mwalikwatapo ifilonda mukanwa? Emukwai  Awe

Bushe mumaboko mwenu mulabuta nangula ukufitilila ngamwaikata ifyatalala?

Emukwai  Awe

Bushe mwalikwatapo utulonda pamubili? Emukwai  Awe

Ngacili ngefi, londololeni ifyo utulonda twali?

Bushe mwalimona ubupusano mumaala yenu? Emukwai  Awe

Bushe mwalimonapo ukukana umfwa bwino pakuposa amenshi? Emukwai  Awe

Bushe mwalikwatapo ubwafya pakulala? Emukwai  Awe

Bushe mwalyumfwapo ukunaka sana? Emukwai  Awe

Ngacili ngefi langeni amaka yakunaka ukubomfya sikelo uuli panshi?

Ukukana naka      0      1      2      3      4      5      6      7      8      9      10      Ukunaka sana

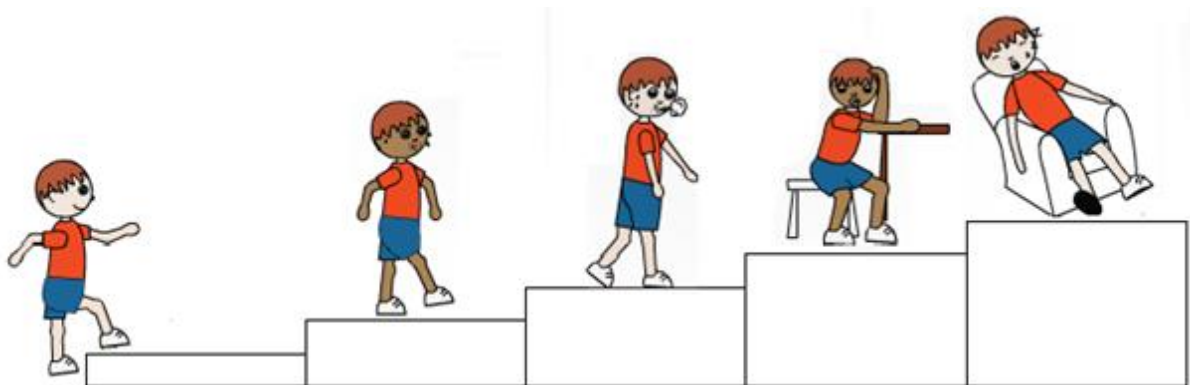

Bushe mwiliumfwapo ukunenuka? Emukwai  Awe

Bushe mwalumonapo naba Rheumatologist (ba shinganga balolekesha pamalwele ya mumunofu namufiputulwa fya mumubili)?

Emukwai  Awe

Bushe mwalilwalapo ubulwele lwa mumunofu namufiputulwa fya mumubili na mumishipa?

Emukwai  Awe

Nga cilifi, kufwailishanshi kwacitike? Mukwai londololeni pamu nga ukupima umulopa, mucifuba:

Bushe kuli umo mulupwa lwenu uwalwalapo ubulwele lwa mumunofu namufiputulwa fya mumubili na mumishipa?

Emukwai  Awe

Ngacilifi, ninani elyo bulwele nshi?
