# Supplementary material for: Impact of musculoskeletal symptoms on physical functioning and quality of life among treated people with HIV in high and low resource settings: A case study of the UK and Zambia
Source: PubMed Central journal article supplement (PMC6513081; doi:10.1371/journal.pone.0216787), 2019-05-13
Supplement: pone.0216787.s003.pdf [file pone.0216787.s003.pdf]

## Ilya mepusho:

### Ukupima Ukukwanisha Kwamilimo Ukubomfya Icipepala Cakufwailikisha Palwa pa Bumi

Mukwai congeni ubwasuko ubulelondelola bwino eflyo ukukwanisha kwenu ukwapali cila bushiku mu mulungu uyu uwapita

|                                                                                           | Ukuwabula<br>ubwafya     | Nobwafya<br>ubunono      | Nobwafya<br>sana         | Ukukana<br>kwanisha      |
|-------------------------------------------------------------------------------------------|--------------------------|--------------------------|--------------------------|--------------------------|
| <b>1. Ukufwala nokuiwamya</b>                                                             |                          |                          |                          |                          |
| Bushe mulakwanisha:                                                                       |                          |                          |                          |                          |
| a. Ukufwala mwebene,<br>ukulundapo nokukaka<br>insapato nukukaka ama<br>batani?           | <input type="checkbox"/> | <input type="checkbox"/> | <input type="checkbox"/> | <input type="checkbox"/> |
| b. Ikuwamya/ukusamba<br>mumishishi?                                                       | <input type="checkbox"/> | <input type="checkbox"/> | <input type="checkbox"/> | <input type="checkbox"/> |
| <b>2. Ukwima</b>                                                                          |                          |                          |                          |                          |
| Bushe mulakwanisha:                                                                       |                          |                          |                          |                          |
| a. Ukwima pacipuna<br>icabula ifyakwikatilako?                                            | <input type="checkbox"/> | <input type="checkbox"/> | <input type="checkbox"/> | <input type="checkbox"/> |
| b. Ikwingila nokufuma<br>mubusanshi?                                                      | <input type="checkbox"/> | <input type="checkbox"/> | <input type="checkbox"/> | <input type="checkbox"/> |
| <b>3. Ukulya</b>                                                                          |                          |                          |                          |                          |
| Bushe mulakwanisha:                                                                       |                          |                          |                          |                          |
| a. Ukuiputwila inama?                                                                     | <input type="checkbox"/> | <input type="checkbox"/> | <input type="checkbox"/> | <input type="checkbox"/> |
| b. Ikwimya inkomoki<br>nangula itambula<br>ilyaisula ukufika<br>kukanwa?                  | <input type="checkbox"/> | <input type="checkbox"/> | <input type="checkbox"/> | <input type="checkbox"/> |
| c. Ukwisula icibokoshi ca<br>mukaka icipya (nangula<br>isopo lya bunga<br>ilyakucapila) ? | <input type="checkbox"/> | <input type="checkbox"/> | <input type="checkbox"/> | <input type="checkbox"/> |

|  | Ukuwabula<br>ubwafya | Nobwafya<br>ubunono | Nobwafya<br>sana | Ukukana<br>kwanisha |
|--|----------------------|---------------------|------------------|---------------------|
|--|----------------------|---------------------|------------------|---------------------|

4. Ukwenda

Bushe mulakwanisha Are:

- |                                                                 |                          |                          |                          |                          |
|-----------------------------------------------------------------|--------------------------|--------------------------|--------------------------|--------------------------|
| a. Ukwenda panse pamushili uwalingana?                          | <input type="checkbox"/> | <input type="checkbox"/> | <input type="checkbox"/> | <input type="checkbox"/> |
| b. Ukunina pamulu apali impendwa iyapakunina ukuyapamulu isano? | <input type="checkbox"/> | <input type="checkbox"/> | <input type="checkbox"/> | <input type="checkbox"/> |

5. Ubusaka

Bushe mulakwanisha :

- |                                           |                          |                          |                          |                          |
|-------------------------------------------|--------------------------|--------------------------|--------------------------|--------------------------|
| a. Ukusamba nokupukuta umubili wenu onse? | <input type="checkbox"/> | <input type="checkbox"/> | <input type="checkbox"/> | <input type="checkbox"/> |
| b. Ukusamba?                              | <input type="checkbox"/> | <input type="checkbox"/> | <input type="checkbox"/> | <input type="checkbox"/> |
| c. Ukunina nokufuma pa cimbusu?           | <input type="checkbox"/> | <input type="checkbox"/> | <input type="checkbox"/> | <input type="checkbox"/> |

6. Ukufika

Bushe kuti mwakwanisha:

- |                                                                                                                                        |                          |                          |                          |                          |
|----------------------------------------------------------------------------------------------------------------------------------------|--------------------------|--------------------------|--------------------------|--------------------------|
| a. Ukwimya nokutula panshi icintu cafina impendwa shisanu -5 lb (icapala isaka Iya imambati) ukufuma pancende iicilile pamutwe panono? | <input type="checkbox"/> | <input type="checkbox"/> | <input type="checkbox"/> | <input type="checkbox"/> |
| b. Ukukontama nokusenda ifyakufwala ukufuma panshi?                                                                                    | <input type="checkbox"/> | <input type="checkbox"/> | <input type="checkbox"/> | <input type="checkbox"/> |

7. Ukufina

Bushe mulakwanisha:

- |                                         |                          |                          |                          |                          |
|-----------------------------------------|--------------------------|--------------------------|--------------------------|--------------------------|
| a. Ukwisula ifibi fya myotoka?          | <input type="checkbox"/> | <input type="checkbox"/> | <input type="checkbox"/> | <input type="checkbox"/> |
| b. Ukwisula amabotolo ayaisulwapo kale? | <input type="checkbox"/> | <input type="checkbox"/> | <input type="checkbox"/> | <input type="checkbox"/> |
| c. Ukwisula nokwisala pompi wamenshi    | <input type="checkbox"/> | <input type="checkbox"/> | <input type="checkbox"/> | <input type="checkbox"/> |

|  | Ukuwabula<br>ubwafya | Nobwafya<br>ubunono | Nobwafya<br>sana | Ukukana<br>kwanisha |
|--|----------------------|---------------------|------------------|---------------------|
|--|----------------------|---------------------|------------------|---------------------|

8. Ifyakucita

Bushe mulakwanisha:

- |                                                                                                                                    |                          |                          |                          |                          |
|------------------------------------------------------------------------------------------------------------------------------------|--------------------------|--------------------------|--------------------------|--------------------------|
| a. Ukubomba imilimo yacila bushiku iya pang'anda nokushita?                                                                        | <input type="checkbox"/> | <input type="checkbox"/> | <input type="checkbox"/> | <input type="checkbox"/> |
| b. Ukwingila nokufuma muli ba motoka?                                                                                              | <input type="checkbox"/> | <input type="checkbox"/> | <input type="checkbox"/> | <input type="checkbox"/> |
| c. Ukubomba imilimo ya mung'anda pamo nga ukufumya ulukungu naba mashini, imilimo ya mug'anda elyo nokubomba mumabala ukwayanguka? | <input type="checkbox"/> | <input type="checkbox"/> | <input type="checkbox"/> | <input type="checkbox"/> |

Mukwai congeni ifyakwafwilisha nangula ifibombelo eflyo mubomfya ilingi mumilimo yonse iyi:

- |                                                        |                                                                               |                                                                                |
|--------------------------------------------------------|-------------------------------------------------------------------------------|--------------------------------------------------------------------------------|
| Inkonto <input type="checkbox"/>                       | Inkonto yakwendamo <input type="checkbox"/>                                   | Ifyakubomfya ifya ibela ifyakubumba nangula ifyaibela <input type="checkbox"/> |
| Inkonto yakwendela <input type="checkbox"/>            | Icipuna cakwendelamo <input type="checkbox"/>                                 | icipuna ickwendelamo icaibela icakupanga <input type="checkbox"/>              |
| Icimbusuabela pamulu <input type="checkbox"/>          | Icipuna cakusambilapo <input type="checkbox"/>                                | Icakushintilishapo pakusambal <input type="checkbox"/>                         |
| Ifyakusendelako ifili apatali <input type="checkbox"/> | Icakwiswilako amabotolo (ica mabotolo yaisulwa kale) <input type="checkbox"/> |                                                                                |

Ifyakubomfya pakufwala (amabatani, zipu, insapato)

Fimbi (Mukwai lonololeni): Takuli

Mukwai congeni ifilifyonse mufwayamo ubwafwilisho ukufuma kulibambi ilingi:

- |                                              |                                                                 |
|----------------------------------------------|-----------------------------------------------------------------|
| Ukufwala nokuiwamya <input type="checkbox"/> | Ukulya <input type="checkbox"/>                                 |
| Ukwima <input type="checkbox"/>              | Ukwenda <input type="checkbox"/>                                |
| Ubusaka <input type="checkbox"/>             | Ukufina nokwisula ifintu <input type="checkbox"/>               |
| UkufikaReach <input type="checkbox"/>        | Imilimo sha lyonse elyo neshapang'anda <input type="checkbox"/> |
| Takuli <input type="checkbox"/>              |                                                                 |
