# Supplementary material for: Impact of musculoskeletal symptoms on physical functioning and quality of life among treated people with HIV in high and low resource settings: A case study of the UK and Zambia
Source: PubMed Central journal article supplement (PMC6513081; doi:10.1371/journal.pone.0216787), 2019-05-13
Supplement: pone.0216787.s004.pdf [file pone.0216787.s004.pdf]

## Ampusho:

### SF- 36 Questionnaire – Imibele ya bumi

Mukwia congeni ubwasuko ubulelondolola bwino fintu mukwanisha ifya cila bushiku elyo napalwabumi

#### Ubumi bonse

1. ukulolekesha fyonse, kuti mwalanda ukuti muleyumfwa shani ubumi?

Ubusuma ukupitilila  Ubusuma sana  Ubusuma  Efilyako  Ububi

2. Ukulinganya nomwaka wafumapo, kuti mwalanda ukuti muleyumfwa shani ubumi mukulolekesha fyonse nombamba?

Kwawamapo ukucila umwaka wafumapo   
Kwawamapo panono ukucila umwaka uwapita   
Ukulinganako   
Ukubipapo panonon ukucila umwaka wapiti   
Ububi sana ukucila umwaka wapiti

#### Ukapelelwa kwa mumilimo

Ifintu fililekonka fili pamilimo mungabomba mubushiku ubuli ngenhiku shonse. Bushe ubumi bwenu bulemikanya nombamba mumilimo ishi? Ngacilifi munshilanshi?

3. Incite shakosa, pamo ngokubutuka, ukwimya ifyafina, ikusenda ulubalii mu mangalo ayakuso.

Emukwai, ndefilwa sana                      Emukwai ndefilwa panono                      Awe, nshilefilwa napanono

4. Imilimo yapakati pamo nga, ukusesha itebulo, mashini yakufumya ulukungu, ukuteya amangalo yakuposa umupila nokuma nenkonto. (bowling nangula golf).

Emukwai, ndefilwa sana                      Emukwai ndefilwa panono                      Awe, nshilefilwa napanono

5. Ukwimya ifyakushita

Emukwai, ndefilwa sana

Emukwai ndefilwa panono

Awe, nshilefilwa napanono

6. Ukunina imitantu iyingi iya mucikulwa

Emukwai, ndefilwa sana

Emukwai ndefilwa panono

Awe, nshilefilwa napanono

7. Ukunina umutanto umouwamucikulwa

Emukwai, ndefilwa sana

Emukwai ndefilwa panono

Awe, nshilefilwa napanono

8. Ukwinama, ukufukama nangula ukukontama

Emukwai, ndefilwa sana

Emukwai ndefilwa panono

Awe, nshilefilwa napanono

9. Ukwenda ubutali ubulecila imailo limo

Emukwai, ndefilwa sana

Emukwai ndefilwa panono

Awe, nshilefilwa napanono

10. Ukenda panshi ukupitilila ifikulwa ifingi

Emukwai, ndefilwa sana

Emukwai ndefilwa panono

Awe, nshilefilwa napanono

11. Ukwenda panshi ukupita icikulwa cimo

Emukwai, ndefilwa sana

Emukwai ndefilwa panono

Awe, nshilefilwa napanono

12. Ukusamba nangula ukufwala mwebene

Emukwai, ndefilwa sana

Emukwai ndefilwa panono

Awe, nshilefilwa napanono

*Amafya ya ku mubili*

Mumilungu yapita ine bushe mwalikwatako amafya ayalekonkapo kunchito yenu nangula kumilimo ya cila bushiku umulandu wa mibele ya bumi kumubili?

13. Ukucefyako inshita mwasendele kuncito nangula imilimo imbi

Emukwai

Awe

14. Ukukana fika ngepo mungafwaya

Emukwai

Awe

15. Mwalifilwa mumibele ya ncito nangula imilimo imbi.

Emukwai

Awe

16. Mwalisanga ubwafya ukubomba incito nangula imilimo shimbi (ukupalanya, incito yalikosesha)

Emukwai

Awe

*Amafya yabulwele wa matontonkanyo*

Mumilungu ine iyapita, bushe mwalikwatako amafya ayalekonkapo kunchito nangula ku milimo imbi pamulandu wamafya yamatontonkanyo (pamo nga ukumfwa icikonko nangula ukucetekela) During the past 4 weeks, have you had any of the following problems with your work or other regular daily activities as a result of any emotional problems (such as feeling depressed or umwenso)?

17. Ukucefyako inshita mwasendele kuncito nangula imilimo imbi

Emukwai

Awe

18. Ukukana fika ngepo mungafwaya

Emukwai

Awe

19. Tamwabombele incite nangula imilimo imbi nobulondo ngalyonse

Emukwai

Awe

*Imilimo yakwampana*

20. Mumilungu ine iyapita, nimunshila nshi umo amafya ya kumumubili namumatontonkanyo yalenga ukukana ba bwino mukwampana kwenu nabalupwa, ifibusa, abena mupalamano nangula utubungwe?

Takuli

panono

Pakati

Sana

Icabipa sana

*Ubukali*

21. Bukali bwakosa shani ubwamumubili ebo mwakwete mumilungu ine iyapita?

Takuli nangula  
panono

Panono sana

panono

pakati

Sana

Ikubipa sana

22. Mumilungu ine iyapita, nimunshila nshi ubukali bwaonawile incito yenu iyalyonse (ikulundapo incito shapanse yang'anda neyamung'anda)?

|                          |        |        |            |      |
|--------------------------|--------|--------|------------|------|
| Takuli nangula<br>panono | panono | pakati | mubwingiko | Sana |
|--------------------------|--------|--------|------------|------|

*Amaka elyo namatontonkanyo*

Aya amepusho yapafyo muleumfwa elyo nefyo ifintu fyali kuli imwe mumilungu ine iyapita. Palipusho lyonse, mukwai peleni ubwasuko ubupalamine nefyo mwaleumfwa.

23. Bushe muliyumfwa abansansa (ukumfya amaka nokutemwa sana)?

|               |                       |                                   |                        |                      |                                    |
|---------------|-----------------------|-----------------------------------|------------------------|----------------------|------------------------------------|
| Yonse inshita | Ubwingi bwa<br>nshita | Ukupalama<br>ubwingi<br>bwanshita | Inshita shimo<br>shimo | Munshita<br>ishinono | Taficitika<br>inshita<br>iiliyonse |
|---------------|-----------------------|-----------------------------------|------------------------|----------------------|------------------------------------|

24. Bushe mwalibapo umuntu wamwensana sana?

|               |                       |                                   |                        |                      |                                    |
|---------------|-----------------------|-----------------------------------|------------------------|----------------------|------------------------------------|
| Yonse inshita | Ubwingi bwa<br>nshita | Ukupalama<br>ubwingi<br>bwanshita | Inshita shimo<br>shimo | Munshita<br>ishinono | Taficitika<br>inshita<br>iiliyonse |
|---------------|-----------------------|-----------------------------------|------------------------|----------------------|------------------------------------|

25. Bushe mwalibapo ababula insansa icakuti tapali nefinga lenga ukumisekeshako?

|               |                       |                                   |                        |                      |                                    |
|---------------|-----------------------|-----------------------------------|------------------------|----------------------|------------------------------------|
| Yonse inshita | Ubwingi bwa<br>nshita | Ukupalama<br>ubwingi<br>bwanshita | Inshita shimo<br>shimo | Munshita<br>ishinono | Taficitika<br>inshita<br>iiliyonse |
|---------------|-----------------------|-----------------------------------|------------------------|----------------------|------------------------------------|

26. Bushe mulomfwa umutimfa ukutalala elyo nomutende?

|               |                       |                                   |                        |                      |                                    |
|---------------|-----------------------|-----------------------------------|------------------------|----------------------|------------------------------------|
| Yonse inshita | Ubwingi bwa<br>nshita | Ukupalama<br>ubwingi<br>bwanshita | Inshita shimo<br>shimo | Munshita<br>ishinono | Taficitika<br>inshita<br>iiliyonse |
|---------------|-----------------------|-----------------------------------|------------------------|----------------------|------------------------------------|

27. Bushe mwalikwata amaka ayengi?

|               |                       |                                   |                        |                      |                                    |
|---------------|-----------------------|-----------------------------------|------------------------|----------------------|------------------------------------|
| Yonse inshita | Ubwingi bwa<br>nshita | Ukupalama<br>ubwingi<br>bwanshita | Inshita shimo<br>shimo | Munshita<br>ishinono | Taficitika<br>inshita<br>iiliyonse |
|---------------|-----------------------|-----------------------------------|------------------------|----------------------|------------------------------------|

28. Bushe mwaliyumfwapo abacikonko kumutima elyo nokukanaba nensansa?

|               |                       |                                   |                        |                      |                                    |
|---------------|-----------------------|-----------------------------------|------------------------|----------------------|------------------------------------|
| Yonse inshita | Ubwingi bwa<br>nshita | Ukupalama<br>ubwingi<br>bwanshita | Inshita shimo<br>shimo | Munshita<br>ishinono | Taficitika<br>inshita<br>iiliyonse |
|---------------|-----------------------|-----------------------------------|------------------------|----------------------|------------------------------------|

29. Bushe mwaliyumfwapo ukunaka sana?

|               |                       |                                   |                        |                      |                                    |
|---------------|-----------------------|-----------------------------------|------------------------|----------------------|------------------------------------|
| Yonse inshita | Ubwingi bwa<br>nshita | Ukupalama<br>ubwingi<br>bwanshita | Inshita shimo<br>shimo | Munshita<br>ishinono | Taficitika<br>inshita<br>iiliyonse |
|---------------|-----------------------|-----------------------------------|------------------------|----------------------|------------------------------------|

30. Bushe mwalibapo umuntu wansansa?

|               |                       |                                   |                        |                      |                                    |
|---------------|-----------------------|-----------------------------------|------------------------|----------------------|------------------------------------|
| Yonse inshita | Ubwingi bwa<br>nshita | Ukupalama<br>ubwingi<br>bwanshita | Inshita shimo<br>shimo | Munshita<br>ishinono | Taficitika<br>inshita<br>iiliyonse |
|---------------|-----------------------|-----------------------------------|------------------------|----------------------|------------------------------------|

31. Bushe mwaliumfwa ukunaka?

|               |                       |                                   |                        |                      |                                    |
|---------------|-----------------------|-----------------------------------|------------------------|----------------------|------------------------------------|
| Yonse inshita | Ubwingi bwa<br>nshita | Ukupalama<br>ubwingi<br>bwanshita | Inshita shimo<br>shimo | Munshita<br>ishinono | Taficitika<br>inshita<br>iiliyonse |
|---------------|-----------------------|-----------------------------------|------------------------|----------------------|------------------------------------|

*Imilimo shakwampana*

32. Mumilungu ine iyapita, ninshita iyinga shani amafya ya kumumubili namumatontonkanyo yalenga ukukana ba bwino mumilimo ya kwampana kwenu (pamo ngo kutandalila ifibusa, balupwa, nabambi)?

|               |                       |                                   |                        |                      |
|---------------|-----------------------|-----------------------------------|------------------------|----------------------|
| Yonse inshita | Ubwingi bwa<br>nshita | Ukupalama<br>ubwingi<br>bwanshita | Inshita shimo<br>shimo | Munshita<br>ishinono |
|---------------|-----------------------|-----------------------------------|------------------------|----------------------|

*Ukulolekesha palwabumi konse konse*

Bushe muli ifishinka nangula iyoo mumashiwi ayasoswa kulubali lwenu?

33. Mboneka ukuba uwakwangufyana ukulwalilila ukucila abantu bambi

|                                  |                     |           |              |                               |
|----------------------------------|---------------------|-----------|--------------|-------------------------------|
| Cishinka icabula<br>nokutwishika | Cishinka ilingiline | Nshishibe | Tefyo ilingi | Tefyo icabula<br>nokutwishika |
|----------------------------------|---------------------|-----------|--------------|-------------------------------|

34. Ndimutuntulu ngomuntu uulu oonse naishiba

|                                  |                     |           |              |                               |
|----------------------------------|---------------------|-----------|--------------|-------------------------------|
| Cishinka icabula<br>nokutwishika | Cishinka ilingiline | Nshishibe | Tefyo ilingi | Tefyo icabula<br>nokutwishika |
|----------------------------------|---------------------|-----------|--------------|-------------------------------|

35. Ndemona ubumi bwandi ukuba ubwabipa

|                                  |                     |           |              |                               |
|----------------------------------|---------------------|-----------|--------------|-------------------------------|
| Cishinka icabula<br>nokutwishika | Cishinka ilingiline | Nshishibe | Tefyo ilingi | Tefyo icabula<br>nokutwishika |
|----------------------------------|---------------------|-----------|--------------|-------------------------------|

36. Ubumi bwandi buli bwino sana

Cishinka icabula  
nokutwishika

Cishinka ilingiline

Nshishibe

Tefyo ilingi

Tefyo icabula  
nokutwishika
