# Supplementary material for: Impact of musculoskeletal symptoms on physical functioning and quality of life among treated people with HIV in high and low resource settings: A case study of the UK and Zambia
Source: PubMed Central journal article supplement (PMC6513081; doi:10.1371/journal.pone.0216787), 2019-05-13
Supplement: pone.0216787.s005.pdf [file pone.0216787.s005.pdf]

## Socio-demographic data:

nambala la odwala:

Amuna

Akazi

Zaka

Zaka pomwe mu na onedwa

Ndi zaka zingati mukalibe ku onedwa

None

Primary

Secondary

College

University

Muyeso wa ndalama zomwe mulandila:  $\leq$  K10 000

K10 000 – 30 000

K30 000 – 50 000

$\geq$  K50 000

Za Chikwati: Ndinu okwatila/kwatila

osakwatila

kusewenzela pamodzi

Kumbali Za Nchito: Munthu olembedwa nchito

Amene Sasewenza

Nchito:

Kodi ndi mwe mu sewenza ba banja lanu: Ndi bvomekeza

Sindi bvomekeza

Ndi wa chipembezo:

Ndi bvomekeza

Ndi bvomekeza

kupima (utali Ndi Kulema):

Njila zo tengelamo kadoyo : ku gonana ndi amuna/akazi

ku khuza zinthu za magari

Amai kupsila mwana kadoyo

Kodi muli ndi mabvuto monga aya?

|                                   |  |
|-----------------------------------|--|
| Zolinga ku Mankwala ndi chipatala |  |
| Zo tumbula                        |  |
| Zolinga ku Maganizo               |  |

kodi muli ndi?

Hepatitis B: Ndi bvomekeza  Sindi bvomekeza

Hepatitis C: Ndi bvomekeza  Sindi bvomekeza  Ana polesedwa bwino

Matenda a TB: Ndi bvomekeza  Sindi bvomekeza  Ana polesedwa bwino

Matenda ena akatengela: Ndi bvomekeza  Sindi bvomekeza  Ana polesedwa

Ngati ndi telo ndi liti? onetsani pansu apa

Unyinji wa mphamvu za mthupi: Ndi bvomekeza  Sindi bvomekeza

Unyinji wa kadoyo ka HIV:

Ndi bvomekeza  Sindi bvomekeza

Kodi mukumwa mankwala a ma ARVs?

Ndi ma ARVs otani a mene mu kumwa?

Tikupemphani kuti muti udzeko za pa tsiku ndi za ka mwedwe ka mankwala kuti ndi angati?
