# Supplementary material for: Impact of musculoskeletal symptoms on physical functioning and quality of life among treated people with HIV in high and low resource settings: A case study of the UK and Zambia
Source: PubMed Central journal article supplement (PMC6513081; doi:10.1371/journal.pone.0216787), 2019-05-13
Supplement: pone.0216787.s007.pdf [file pone.0216787.s007.pdf]

## Questionnaire:

### Functional Capacity using the Health Assessment Questionnaire

tiku pemphani kuti mu chonge ku langiza mwa mene mu na kwansila pa kuchita zinthu zo siana pa sabatha la pita.

|                                                                          | kopanda bvuto<br>iliyonse | Ndi bvuto la pa<br>ng'ono | Kopanda<br>bvuto la likulu | kulepela ku<br>chita     |
|--------------------------------------------------------------------------|---------------------------|---------------------------|----------------------------|--------------------------|
| <b>1. Kubvala ndi ku konzekela</b>                                       |                           |                           |                            |                          |
| Kodi mukwanisa ku:                                                       |                           |                           |                            |                          |
| a. Zivalika ndi ku manga<br>nthambo za nsapato ndi ku<br>manga ma batani | <input type="checkbox"/>  | <input type="checkbox"/>  | <input type="checkbox"/>   | <input type="checkbox"/> |
| b. ku sambika mu mutu                                                    | <input type="checkbox"/>  | <input type="checkbox"/>  | <input type="checkbox"/>   | <input type="checkbox"/> |
| <b>2. Kuima</b>                                                          |                           |                           |                            |                          |
| Kodi munga kwanise ku:                                                   |                           |                           |                            |                          |
| a. ku nyamuka pa mu pando<br>ulibe manja}                                | <input type="checkbox"/>  | <input type="checkbox"/>  | <input type="checkbox"/>   | <input type="checkbox"/> |
| b. ku lowa ndi ku nyamuka po<br>gona                                     | <input type="checkbox"/>  | <input type="checkbox"/>  | <input type="checkbox"/>   | <input type="checkbox"/> |
| <b>3. Kudya</b>                                                          |                           |                           |                            |                          |
| Kodi munga kwanise ku:                                                   |                           |                           |                            |                          |
| a. kujuwa nyama yanu                                                     | <input type="checkbox"/>  | <input type="checkbox"/>  | <input type="checkbox"/>   | <input type="checkbox"/> |
| b. ku nyamula cup ya gilasi<br>ndi kuika ku kamwa kanu                   | <input type="checkbox"/>  | <input type="checkbox"/>  | <input type="checkbox"/>   | <input type="checkbox"/> |
| c. ku tsegula chi katundu cha<br>mkaka kapena sopo lo<br>chapila la unga | <input type="checkbox"/>  | <input type="checkbox"/>  | <input type="checkbox"/>   | <input type="checkbox"/> |

| 4. Kuyenda | kopanda bvuto<br>iliyonse} | bvuto la pa<br>ng'ono | bvuto la<br>maningi} | kulepela ku<br>chuita} |
|------------|----------------------------|-----------------------|----------------------|------------------------|
|------------|----------------------------|-----------------------|----------------------|------------------------|

---

Kodi munga kwanise ku:

- |                                  |                          |                          |                          |                          |
|----------------------------------|--------------------------|--------------------------|--------------------------|--------------------------|
| a. Kuyenda pabwalo?              | <input type="checkbox"/> | <input type="checkbox"/> | <input type="checkbox"/> | <input type="checkbox"/> |
| b. Kuyenda myenda zili<br>asanu? | <input type="checkbox"/> | <input type="checkbox"/> | <input type="checkbox"/> | <input type="checkbox"/> |

5. Udongo

---

Kodi munga kwanise ku:

- |                                                   |                          |                          |                          |                          |
|---------------------------------------------------|--------------------------|--------------------------|--------------------------|--------------------------|
| a. Ku sambika ndi ku yumitsa<br>thupi lako lonse? | <input type="checkbox"/> | <input type="checkbox"/> | <input type="checkbox"/> | <input type="checkbox"/> |
| b. Ku samba pa thupi?                             | <input type="checkbox"/> | <input type="checkbox"/> | <input type="checkbox"/> | <input type="checkbox"/> |
| c. Ku ngeni ndi ku choka mu<br>chimbuzi?          | <input type="checkbox"/> | <input type="checkbox"/> | <input type="checkbox"/> | <input type="checkbox"/> |

6. Kufika

---

Kodi munga kwanise ku:

- |                                                                         |                          |                          |                          |                          |
|-------------------------------------------------------------------------|--------------------------|--------------------------|--------------------------|--------------------------|
| a. Ku tenga thumba la<br>mbatasisi ili pa mutu panu<br>ndi ku ika pansu | <input type="checkbox"/> | <input type="checkbox"/> | <input type="checkbox"/> | <input type="checkbox"/> |
| b. ku welama kuti ndi tenge<br>nyula/nsalu ili pansu?                   | <input type="checkbox"/> | <input type="checkbox"/> | <input type="checkbox"/> | <input type="checkbox"/> |

7. Ku gwilisa

---

Kodi mu kwanitsa ku:

- |                                                      |                          |                          |                          |                          |
|------------------------------------------------------|--------------------------|--------------------------|--------------------------|--------------------------|
| a. Ku tsegula ziseko za gali<br>moto?                | <input type="checkbox"/> | <input type="checkbox"/> | <input type="checkbox"/> | <input type="checkbox"/> |
| b. Ku tsegula mbiya zimene<br>zina tseguliwapo kale? | <input type="checkbox"/> | <input type="checkbox"/> | <input type="checkbox"/> | <input type="checkbox"/> |
| c. Ku vala ma pompi a madzi?                         | <input type="checkbox"/> | <input type="checkbox"/> | <input type="checkbox"/> | <input type="checkbox"/> |

|  |                           |                      |                     |                         |
|--|---------------------------|----------------------|---------------------|-------------------------|
|  | kopanda bvuto<br>iliyonse | Bvuto la<br>pang'ono | Bvuto la li<br>kulu | Kulepephela<br>ku chita |
|--|---------------------------|----------------------|---------------------|-------------------------|

8. Zo chitika

Kodi unga kwanise ku;

- |                                                                                                                         |                          |                          |                          |                          |
|-------------------------------------------------------------------------------------------------------------------------|--------------------------|--------------------------|--------------------------|--------------------------|
| a. Za ma ulendo ndi malonda?                                                                                            | <input type="checkbox"/> | <input type="checkbox"/> | <input type="checkbox"/> | <input type="checkbox"/> |
| b. Ku ngena ndi kuchoka mu gali moto?                                                                                   | <input type="checkbox"/> | <input type="checkbox"/> | <input type="checkbox"/> | <input type="checkbox"/> |
| c. Ku gwila nchito za pa nyumba ngati; ku pyela mwa ku sewenzesa makina a malaiti, ndi ku samalila maluwa ndi mu munda? | <input type="checkbox"/> | <input type="checkbox"/> | <input type="checkbox"/> | <input type="checkbox"/> |

Tikupemphani kuti musankepo zili zonse zo thandizila zi mene mu ma sewenzesa pa zo chitika zo monga izi:

- |                                           |                          |                                                                   |                          |                                                                                           |                          |
|-------------------------------------------|--------------------------|-------------------------------------------------------------------|--------------------------|-------------------------------------------------------------------------------------------|--------------------------|
| Ka mtengo                                 | <input type="checkbox"/> | nsimbi zo thandizila kuti olemala kapena odwala kuti ayende bwino | <input type="checkbox"/> | Zinthu zo sewenzesa                                                                       | <input type="checkbox"/> |
| Ndodo                                     | <input type="checkbox"/> | ka mpando ka ma wilo awili ka mene odwala ama sewenzesa           | <input type="checkbox"/> | Mpanda onyamuka mwamba                                                                    | <input type="checkbox"/> |
| chi poto cho nkalapo pa ku chita chimbuzi | <input type="checkbox"/> | Mo sambila                                                        | <input type="checkbox"/> | Ka nsimbi ka mene ka ikidwapo zo sambila ngati nyula ndi zo pukutira thupi ndi zina zache | <input type="checkbox"/> |
| Zo sewenzesa zili ndi zogwilila zitali    | <input type="checkbox"/> |                                                                   |                          | Zo tsegulila mbiya                                                                        | <input type="checkbox"/> |
| Zinthu zosewenzesa pa ku bvala            | <input type="checkbox"/> |                                                                   |                          |                                                                                           |                          |
| Zinthu zo sewenzesa pa ku bvala zobvala   | <input type="checkbox"/> |                                                                   |                          |                                                                                           |                          |
| Chulani zina:                             |                          | Kulibe                                                            | <input type="checkbox"/> |                                                                                           |                          |

Chongani pa malo aliyense amene mu ma funa thandizo ku chokela ku ena

- |                        |                          |                                      |                          |
|------------------------|--------------------------|--------------------------------------|--------------------------|
| ku zikonzekela mu mawa | <input type="checkbox"/> | kudya                                | <input type="checkbox"/> |
| ku uka                 | <input type="checkbox"/> | kuyenda                              | <input type="checkbox"/> |
| Udongo                 | <input type="checkbox"/> | kugwila zinthu ndi ku zi segula      | <input type="checkbox"/> |
| kufika                 | <input type="checkbox"/> | Za ma ulendo ndi nchito za pa nyumba | <input type="checkbox"/> |
| Kulibe                 | <input type="checkbox"/> |                                      |                          |
