# Supplementary material for: Impact of musculoskeletal symptoms on physical functioning and quality of life among treated people with HIV in high and low resource settings: A case study of the UK and Zambia
Source: PubMed Central journal article supplement (PMC6513081; doi:10.1371/journal.pone.0216787), 2019-05-13
Supplement: pone.0216787.s008.pdf [file pone.0216787.s008.pdf]

## Questionnaire:

### SF- 36 Questionnaire – Quality of life

Please tick the one response which best describes your usual abilities and health

#### *General Health*

1. Pa zonse, kodi munga kambe kuti umoyo wanu uli otani?

Bwino maningi  Bwino bwino  bwino  nkasako  Sindili bwino

2. kulinganidza ndi chaka chatha, kodi munga kambe kuti umoyo wanu unali otani?

Ndili bwino kupambana ndi chaka cha pita ichi

Ndiliko nkasako kupambana chaka pita ichi

Ndikali chi modzi modzi

Ndili odwala ku pambana chaka cha chatha

odwalilatu koposa chaka chatha

#### *Limitations of Activities*

3. Zosatilapo ndi zo linga ku zimene munga chite mu kati mwa tsiku. Kodi umoyo wanu uma kulephelesani ku pezeka mu zinthu izi.

Ndi kwanisa movutikila                      Ndi kwanisa movutikilako                      Ndi kwanisa kopanda vuto

4. zi nchito za pakati, ngati ku sendeza tebulo, ku sewenzesa makina opyelela.

Ndi kwanisa movutikila                      Ndi kwanisa movutikilako                      Ndi kwanisa kopanda vuto

5. kunyamula zinthu zo sewenzesa mu nyumba ngati soap ndi zina zache zo gula ku ma stolo

Ndi kwanisa movutikila                      Ndi kwanisa movutikilako                      Ndi kwanisa kopanda vuto

6. Kuyenda kuwelenga myendo yangapo

Ndi kwanisa movutikila                      Ndi kwanisa movutikilako                      Ndi kwanisa kopanda vuto

7. Kuyenda kuwelenga myendo

Ndi kwanisa movutikila

Ndi kwanisa movutikilako

Ndi kwanisa kopanda vuto

8. ku welama, ku gwada kapena kuwelamila ku sogolo.

Ndi kwanisa movutikila

Ndi kwanisa movutikilako

Ndi kwanisa kopanda vuto

9. kuyenda mtunda utali.

Ndi kwanisa movutikila

Ndi kwanisa movutikilako

Ndi kwanisa kopanda vuto

10. kuyenda nchelwa zingono.

Ndi kwanisa movutikila

Ndi kwanisa movutikilako

Ndi kwanisa kopanda vuto

11. kuyenda nchelwa imodzi.

Ndi kwanisa movutikila

Ndi kwanisa movutikilako

Ndi kwanisa kopanda vuto

12. ku samba kapena ku dzivalika

Ndi kwanisa movutikila

Ndi kwanisa movutikilako

Ndi kwanisa kopanda vuto

### *Physical Health Problems*

Pa ma sabatha anai apita, muna nkalako ndi mabvuto olinga ku nchito yanu kapena ku zo chitika za tsiku ndi tsiku pa chifukwa cha umoyo wa ku thupi lanu?

13. ku chepetsako nthawi lo gwila ntchito ndi lo chita zinthu zina

Ndibvomekeza

Sindi bvomekeza

14. mu na kwanilisako chabe pa ng'ono ku lingana ndi muyeso mu nali kufuna

Ndibvomekeza

Sindi bvomekeza

15. Mu na pelewela pa nchito mu nali ku chita kapena pa zina zo chitika.

Ndibvomekeza

Sindi bvomekeza

16. Ndi nali ndi bvuto ku gwila ntchito ndi zina zo chitika.

Ndibvomekeza

Sindi bvomekeza

### *Emotional Health Problems*

Pa ma sabatha anai apita, mwa nkalako ndi mabvuto aliyense olinga ku nchito lanu kapena ku zi mene zi ma chitika nthawi zonse chifukwa cha mabvuto a mu mtima kapena kuda nkawa

17. Ku chepetsako pa nthawi lo sewenza pa nchito kapena pa zina zo chitika

Ndibvomekeza

Sindi bvomekeza

18. muna kwanisa pang'ono kulingana ndi muyeso , munali kufuna.

Ndibvomekeza

Sindi bvomekeza

19. sindi na gwile nchito kapena zina zili zonse mo samalila nga ndi nali ku chitila nthawi zonse.

Ndibvomekeza

Sindi bvomekeza

### *Social Activities*

20. pa ma sabatha anai apita, nanga umoyo wanu wa sokonezedwa mo tani ku mbali la banja, anzanu, kapena ku ma gulu

Kunalibe

Pa'ngono

Pakati

kuwawitsa

Kuwawitsa  
maningi

21. Ndi ku wawa kwa bwanji kwa mene mwa nkala nako pa ma sabatha anai apita?

Kulibe

Bwino  
maningi

bwino

pakati

Ku wawitsa

Ku wawitsa  
maningi

22. pa ma sabatha anai apita, ndi ku wawa ko tani ku na sokoneza ntchito-ku onjezelapo nchito la mu nyumba ndi la panja pa nyumba?

kunalibe

Pa ng'ono

Pakati

Pa' ngo'ngo

Kwa maningi

### *Energy and Emotions*

Ma funso aya a langana pa mwa mene munvelela ndi mwa mene zinthu zili pa ma sabatha anai apita. Pa funso iliyonse, pasani yankho imodzi imene ilangiza mwa mene munvelela.

23. kodi munvela kunkala ndi mphamvu maningi?

Nthawi zonse

Nthawi za  
mbili

Ka nthawi  
kataliko

Nthawi zina

Pa ka nthawi

Kulibe

24. kodi mwa nkalako wa kuda nkawa?

Nthawi zonse

Nthawi za  
mbili

Pa ka nthawi

Nthawi zina

Ka nthawi

Kulibe

25. Kodi mu na mvelapo osakondwela kufikila kuti kulibe chi na koza ku ku kondwelesani?

|              |                 |              |             |           |        |
|--------------|-----------------|--------------|-------------|-----------|--------|
| Nthawi zonse | Nthawi za mbili | Pa ka nthawi | Nthawi zina | Ka nthawi | Kulibe |
|--------------|-----------------|--------------|-------------|-----------|--------|

26. Kodi mu na mvelako ku deka mtima ndi mtendere?

|              |                 |              |             |           |        |
|--------------|-----------------|--------------|-------------|-----------|--------|
| Nthawi zonse | Nthawi za mbili | Pa ka nthawi | Nthawi zina | Ka nthawi | Kulibe |
|--------------|-----------------|--------------|-------------|-----------|--------|

27. Kodi muli ndi mphamvu za mbili?

|              |                 |              |             |           |        |
|--------------|-----------------|--------------|-------------|-----------|--------|
| Nthawi zonse | Nthawi za mbili | Pa ka nthawi | Nthawi zina | Ka nthawi | Kulibe |
|--------------|-----------------|--------------|-------------|-----------|--------|

28. Kodi mwanvelako ngati muli ndi chikonko/okumudisidwa kapena osakondwela?

|              |                 |              |             |           |        |
|--------------|-----------------|--------------|-------------|-----------|--------|
| Nthawi zonse | Nthawi za mbili | Pa ka nthawi | Nthawi zina | Ka nthawi | Kulibe |
|--------------|-----------------|--------------|-------------|-----------|--------|

29. Kodi mu na mvelako kulema ko sili lathu nchito?

|              |                 |              |             |           |           |
|--------------|-----------------|--------------|-------------|-----------|-----------|
| Nthawi zonse | Nthawi za mbili | Pa ka nthawi | Nthawi zina | Ka nthawi | Ka nthawi |
|--------------|-----------------|--------------|-------------|-----------|-----------|

30. Kodi mwa nkalapo okondwela

|              |              |              |             |           |           |
|--------------|--------------|--------------|-------------|-----------|-----------|
| Nthawi zonse | Nthawi zonse | Pa ka nthawi | Nthawi zina | Ka nthawi | Ka nthawi |
|--------------|--------------|--------------|-------------|-----------|-----------|

31. Nanga Mwa mvelapo ku lema}

|              |              |              |             |           |           |
|--------------|--------------|--------------|-------------|-----------|-----------|
| Nthawi zonse | Nthawi zonse | Pa ka nthawi | Nthawi zina | Ka nthawi | Ka nthawi |
|--------------|--------------|--------------|-------------|-----------|-----------|

#### *Social Activities*

32. Pa ma sabatha anai apita, ndi nthawi la itali bwanji pa mene umoyo olinga ku thupi kapena pa mabvuto a mu maganizo ana sokoneza pa zolinga ku tandala ndi anzanu ndi alendo,

|              |              |              |             |           |           |
|--------------|--------------|--------------|-------------|-----------|-----------|
| Nthawi zonse | Nthawi zonse | Pa ka nthawi | Nthawi zina | Ka nthawi | Ka nthawi |
|--------------|--------------|--------------|-------------|-----------|-----------|

#### *General Health*

Nenani ngati ndi zoonu kapena ndi boodza pa mau osatilapo aya?

33. Ndi ma dwala mwa pafupi pafupi kusiyana ndi anthu ena.

|                 |               |           |                  |            |
|-----------------|---------------|-----------|------------------|------------|
| Ndi cha zoonadi | Ndi cha zoonu | sindiziwa | Ndi boza kambili | Ndi bozadi |
|-----------------|---------------|-----------|------------------|------------|

34. Ndili ndi umoyo wa thanzi monga wina aliyense amene ndi dziwa

Ndi cha zoonadi      Ndi cha zoonana      sindiziwa      Ndi boza kambili      Ndi bozadi

35. Ndi yembekezela umoyo wanga kudwala kopambana apa.

Ndi cha zoonadi      Ndi cha zoonana      sindiziwa      Ndi boza kambili      Ndi bozadi

36. umoyo wanga uli bwino

Ndi cha zoonadi      Ndi cha zoonana      sindiziwa      Ndi boza kambili      Ndi bozadi
