# Supplementary material for: Impact of musculoskeletal symptoms on physical functioning and quality of life among treated people with HIV in high and low resource settings: A case study of the UK and Zambia
Source: PubMed Central journal article supplement (PMC6513081; doi:10.1371/journal.pone.0216787), 2019-05-13
Supplement: pone.0216787.s009.pdf [file pone.0216787.s009.pdf]

## Questionnaire:

### Rheumatological symptoms:

The following questions refer to things that may have happened since you found out that you had HIV infection. Please tick the appropriate boxes.

Have you had pains in your joints? Yes  No

If so can you rate the severity using the pain rating scale?

No pain 0 1 2 3 4 5 6 7 8 9 10 Worst pain

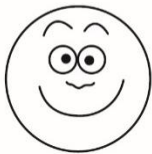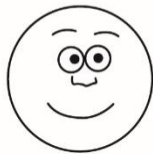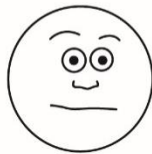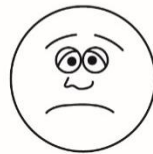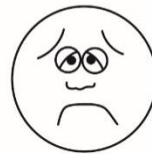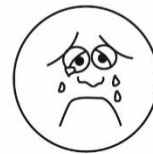

If so, can you please mark on the drawings below, the areas where you feel pain?

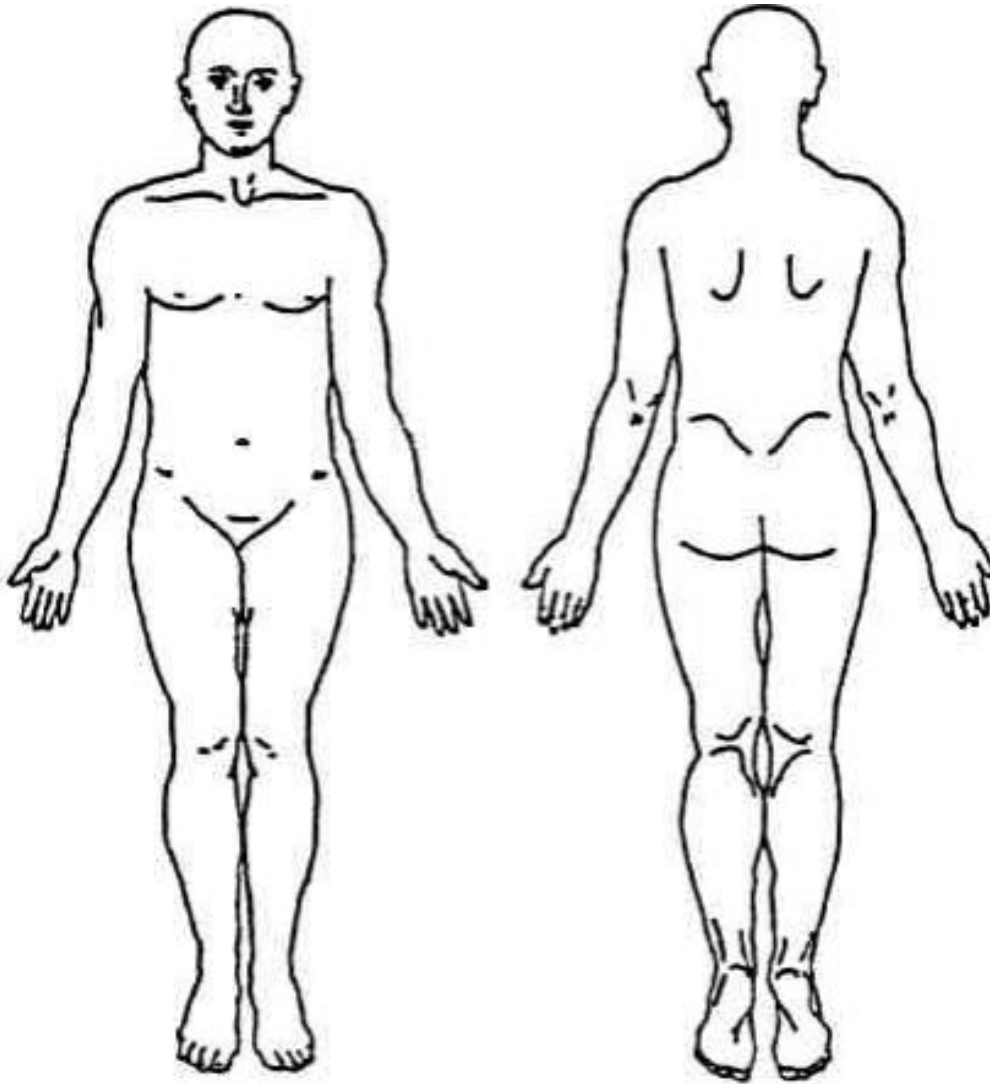

Have you had a swollen red joint? Yes  No

Have you noticed reduced joint movement? Yes  No

Do you have any joint or muscle stiffness in the morning? Yes  No

(By stiffness we mean when it is difficult to move your muscles and bend your joints; they are rigid or firm)

How long does your morning stiffness last from the time you wake up?

Less than 30 minutes

More than 30 minutes

Have you had pains in your muscles? Yes  No

If so can you rate the severity using the pain rating scale?

No pain 0 1 2 3 4 5 6 7 8 9 10 Worst pain

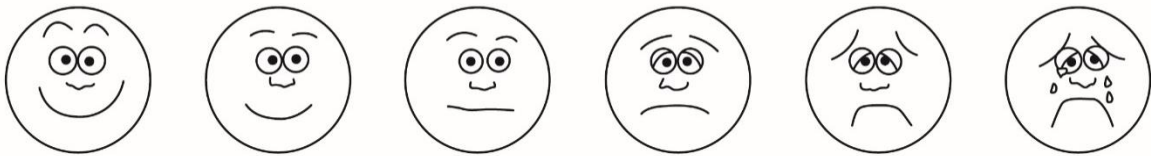

Have you had any neck pain or stiffness? Yes  No

Have you had any back pain or stiffness? Yes  No

Have you noticed any pain in your heels? Yes  No

Have you had difficulty in taking or gripping/squeezing something? Yes  No

Do your eyes persistently burn, feel dry or gritty? Yes  No

Have you had any sores in your mouth? Yes  No

Do your hands turn white or blue on exposure to cold? Yes  No

Have you had any skin rash? Yes  No

If so, can you describe the rash?

Have you noticed any changes in your nails? Yes  No

Have you noticed any discomfort when passing water? Yes  No

Have you had any difficulty sleeping? Yes  No

Have you felt fatigued? Yes  No

If so, can you rate the severity using the below rating scale?

Not fatigued 0 1 2 3 4 5 6 7 8 9 10 Extremely fatigued

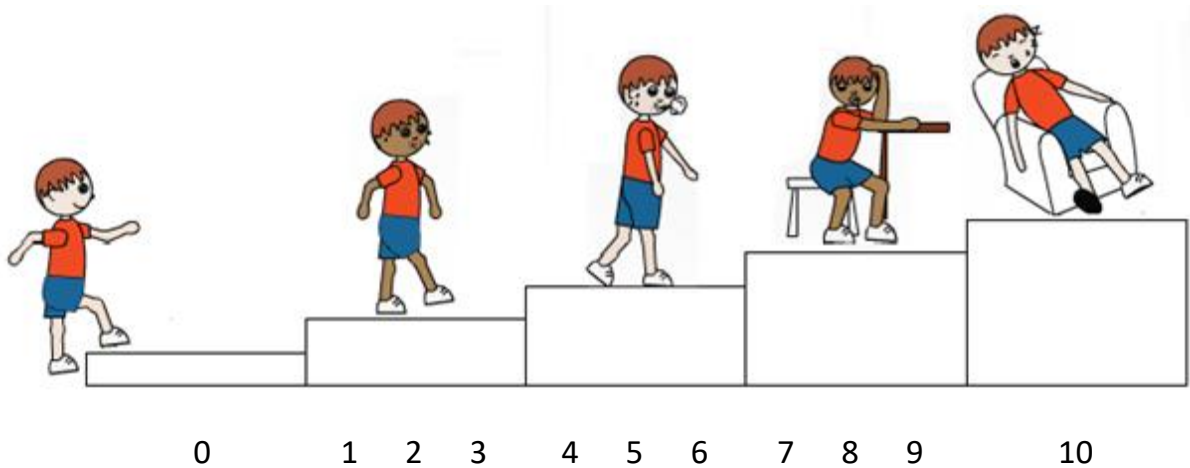

Have you felt weak? Yes  No

Have you ever seen a Rheumatologist (A doctor specialised in diseases of the muscles and joints)?

Yes  No

Have you ever been diagnosed with a rheumatological condition? Yes  No

What investigations were carried out? Please give details e.g. blood tests, x-rays:

Has anyone else in the family ever been diagnosed with a rheumatological condition?

Yes  No

If so, who and with what condition?
