# Supplementary material for: Impact of musculoskeletal symptoms on physical functioning and quality of life among treated people with HIV in high and low resource settings: A case study of the UK and Zambia
Source: PubMed Central journal article supplement (PMC6513081; doi:10.1371/journal.pone.0216787), 2019-05-13
Supplement: pone.0216787.s010.pdf [file pone.0216787.s010.pdf]

## Socio-demographic data:

Patient Number:

### Demographics:

Male  Female

Age  Age at diagnosis:  Years until diagnosis:

Education level: None  Elementary  College  University

Income level (per annum): ≤ £20 000  £20 000 – 30 000  £30 000 – 40 000   
≥ £50 000

Marital status: Married  Single  Partnership

Work status: Employed  Unemployed

Occupation:

Are you the earning member of the family: Yes  No

Religion:

Smoker: Yes  No  BMI (height & weight):

Route of HIV transmission: Heterosexual sex  Homosexual sex  Blood products   
Vertical transmission

Co-morbidities (do you have any other medical, surgical or psychological problems)

|               |  |
|---------------|--|
| Medical       |  |
| Surgical      |  |
| Psychological |  |

Do you have?

Hepatitis B: Yes  No

Hepatitis C: Yes  No

Tuberculosis: Yes  No

Other sexually transmitted infections: Yes  No

If so, which ones? Please provide details below e.g. diagnosis, management:

Number of hospital admissions since diagnosis:

Please give details of each hospital admission e.g. dates, diagnoses, management

Investigations:

Most recent CD4 count:

Most recent viral load:

Management:

Are you taking anti-retroviral therapy? Yes  No

What regimen of anti-retroviral therapy are you taking?

Please give details e.g. dates, dose:
